# Supplementary material
Source: PubMed Central journal article supplement (PMC7617080)
Supplement: EMS118462-supplement-Supplementary_Note_and_Supplementary_Tables_1_4.pdf [file EMS118462-supplement-Supplementary_Note_and_Supplementary_Tables_1_4.pdf]

## Supplementary Note

### Demonstration on Demuxlet paper data

In order to demonstrate souporecell on an external and widely used benchmark dataset, we downloaded the three overlapping mixtures from the demuxlet paper<sup>6</sup>. Sample A contains a mixture of four donors' PBMCs, Sample B contains a mixture of four different donors' PBMCs, and Sample C contains a mixture of all 8 donors' PBMCs. We synthetically combined this data into a single dataset and clustered with souporecell. Supp Fig 4a shows that the resulting clusters either contain cells from Sample A or Sample B, but not both as is expected from this experimental setup. We also show that the first cluster of the doublet assignments are also largely consistent with this experimental design (Supp Fig 4b).

### Deconvolution of overlapping mixtures

To enable identification of which cluster is which individual using the overlapping mixture experimental design outlined in Table 1, we provide a tool `shared_samples.py` which takes as input two souporecell output directories and the number of samples which are shared. It compares the sum of squared differences of the allele fraction of confident (>95% confident genotype call in all clusters) shared variant calls between clusters in the two experiments and outputs the best matches for the number of shared samples. We tested this using multiple different runs of souporecell on the synthetic mixture of 5 HipSci cell lines with 6% doublets and 5% ambient RNA and gave both as input to the `shared_samples.py` tool and it correctly assigned the clusters in one run to the clusters in the second experiment which corresponded to the same samples. We also ran souporecell on the three demuxlet datasets separately and ran the `shared_samples.py` tool on Sample A vs Sample C and Sample B vs Sample C and it confidently identified the non-overlapping clusters in Sample C which correspond to A and B.

### Demonstration on 21 donor sample

We demonstrate that souporecell is capable of demultiplexing many donors by creating a synthetic mixture of 21 different individuals, which given the current recommendations from 10x on cells per run would be a high-end number of donors to multiplex. To generate this 21-donor mix, we used the 5 HipSci samples described in Fig 2 and added to them 16 PBMC samples obtained from the Human Cell Atlas Census of Immune Cells<sup>25</sup>. From each dataset we randomly selected 1000 cells with at least 4000 UMIs and simulated 10% doublets and 2.5% ambient RNA by altering the cell barcodes, as described above. We clustered these with souporecell and the software correctly identifies 1690 of the 2100 synthetic doublets. A further 69 cells were unassigned, and in total we have an ARI of 0.95. Excluding all doublets the ARI is 0.98. We find a total of 134/16800 singletons misassigned where 129 of them are CB8 cells assigned to the CB3 cluster. We show later that this is likely because the CB8 sample is contaminated by another (non CB3) donor. Supp Figure 5 shows the UMAP projection of the normalized cluster log likelihood matrix. It is clear that souporecell is able to handle at least 21 distinct donors and accurately assign cluster identities to the majority of cells.

Because this error type accounted for >95% of singleton errors, we suspected this may be due to contamination. We repeated this experiment with several of the replicates of the CB8 donor and found consistent results. We then made a synthetic mixture of CB3 and CB8 in order to determine if this was due to the large number of donors and it was not. We still found that roughly 20% of CB8 cells would cluster with CB3, but if given 3 clusters, all of those cells formed their own cluster. This made us suspect

that the CB8 sample was contaminated with cells from a different (non CB3) donor. We created an elbow plot and a PCA of the normalized cell x cluster log likelihood matrix, and both support this hypothesis (Supp Fig 6). In communications with the Broad Institute, they confirm that the genomics platform reported 19% contamination with this sample, perhaps from maternal blood as this was a cord blood sample.

### **Downsampling experiments for cells and UMIs**

In order to explore the regime for which it is still possible to accurately demultiplex mixed samples, we used our synthetically mixed 5 HipSci samples and downsampled UMIs (Supp Fig 6a) and cell (Supp Fig 6b) and report the ARI versus the ground truth. We find that while overall clustering remains good, cell assignment accuracy decreases below 800 median UMI per cell and that accuracy remains high down to an average of 40 cells per cluster (Supp Fig 6b).

### **Software versions**

Initial data analysis was done by cellranger v2.1.1 as input to souporecell, demuxlet, vireo, and scSplit

#### Souporcell

<https://github.com/wheaton5/souporcell>

We provide a singularity container build encapsulating all requirements for souporecell as well as a singularity definition file to recreate this container. The following are the software versions for all software excluding software required to build the system.

Freebayes - v1.3.1-17-gaa2ace8

Pyvcf - 0.6.7

Pysam - 0.15.3

Numpy - 1.17.0

Scipy - 1.3.0

Tensorflow - 1.14.0

Pystan - 2.17.1.0

Pyfasta - 0.5.2

Htslib - 1.9

Samtools - 1.9

Bcftools - 1.9

Vartrix - 1.1.3

Minimap2 - 2.7-r654

Bedtools - 2.28.0

#### Demuxlet

<https://github.com/statgen/demuxlet>

git hash 85dca0a4d648d18e6b240a2298672394fe10c6e6

#### Vireo

Cardelino R package version 0.3.8

cellSNP (<https://github.com/huangyh09/cellSNP> version 0.1.6)

#### scSplit

Freebayes - v1.3.1-17-gaa2ace8

<https://github.com/jon-xu/scSplit> git commit hash 52face6a4c1b291651bdf9b56328d168c7cb1fa6

**Supp Table 1: Sample metrics.**

| Sample           | Cells | Median UMI/cell | NOTES                                                  |
|------------------|-------|-----------------|--------------------------------------------------------|
| Mixture1         | 4925  | 25155           | HipSci                                                 |
| Mixture2         | 4832  | 24913           | HipSci                                                 |
| Mixture3         | 5144  | 24807           | HipSci                                                 |
| euts             | 4859  | 25088           | HipSci                                                 |
| nufh             | 6781  | 17254           | HipSci                                                 |
| babz             | 12299 | 11343           | HipSci                                                 |
| oaqd             | 7107  | 18315           | HipSci                                                 |
| ieki             | 6586  | 21969           | HipSci                                                 |
| SyntheticMixture | 7073  | 18793           | synthetic HipSci mixture (5% ambient RNA, 6% doublets) |
| Placenta1        | 3835  | 18415           | Maternal Fetal                                         |
| Placenta2        | 3968  | 18046           | Maternal Fetal                                         |
| Decidua1         | 2119  | 23075           | Maternal Fetal                                         |
| Plasmodium1      | 2608  | 995             | <i>Plasmodium falciparum</i>                           |
| Plasmodium2      | 1893  | 762             | <i>Plasmodium falciparum</i>                           |
| Plasmodium3      | 2293  | 1126            | <i>Plasmodium falciparum</i>                           |

Number of cells and median UMI/cell for each sample including one representative synthetic mixture.

**Supp Table 2: Hipscli clustering.**

|                                                                             | method     | mixture1   | mixture2     | mixture3     | synthetic mixture |
|-----------------------------------------------------------------------------|------------|------------|--------------|--------------|-------------------|
| <b>ARI vs demuxlet single best (excluding doublets called by each tool)</b> | souporcell | 1          | 1            | 1            | n/a               |
|                                                                             | vireo      | 1          | 1            | 1            | n/a               |
|                                                                             | scSplit    | 0.97       | 0.97         | 0.98         | n/a               |
| <b>ARI vs truth (including doublets)</b>                                    | souporcell | n/a        | n/a          | n/a          | 0.99              |
|                                                                             | demuxlet   | n/a        | n/a          | n/a          | 0.76              |
|                                                                             | vireo      | n/a        | n/a          | n/a          | 0.98              |
|                                                                             | scSplit    | n/a        | n/a          | n/a          | 0.94              |
| <b>ambient RNA</b>                                                          | souporcell | 2.70%      | 3%           | 2.70%        | 6.70%             |
|                                                                             | truth      | n/a        | n/a          | n/a          | 5%                |
| <b>doublets</b>                                                             | souporcell | 338 (6.8%) | 313 (6.4%)   | 323 (6.2%)   | 420 (6.0%)        |
|                                                                             | demuxlet   | 1537 (31)  | 1811 (37.5%) | 1596 (31.2%) | 1329 (18.7%)      |
|                                                                             | vireo      | 306 (6.2%) | 287 (5.9%)   | 285 (5.5%)   | 311 (4.4%)        |
|                                                                             | scSplit    | 127 (2.6%) | 107 (2.2)    | 102 (2%)     | 89 (1.2%)         |

|                   |            |      |      |      |            |
|-------------------|------------|------|------|------|------------|
|                   | truth      | n/a  | n/a  | n/a  | 451 (6.4%) |
| <b>euts</b>       | souporcell | 1033 | 1068 | 1177 | 829        |
|                   | demuxlet   | 790  | 743  | 922  | 799        |
|                   | vireo      | 1039 | 1074 | 1185 | 876        |
|                   | scSplit    | 1076 | 1102 | 1211 | 856        |
|                   | truth      | n/a  | n/a  | n/a  | 817        |
| <b>nufh</b>       | souporcell | 659  | 663  | 691  | 1192       |
|                   | demuxlet   | 317  | 264  | 330  | 1037       |
|                   | vireo      | 660  | 665  | 694  | 1211       |
|                   | scSplit    | 707  | 721  | 766  | 1271       |
|                   | truth      | n/a  | n/a  | n/a  | 1183       |
| <b>babz</b>       | souporcell | 739  | 727  | 731  | 2239       |
|                   | demuxlet   | 522  | 459  | 504  | 1591       |
|                   | vireo      | 742  | 734  | 740  | 2241       |
|                   | scSplit    | 818  | 742  | 806  | 2263       |
|                   | truth      | n/a  | n/a  | n/a  | 2242       |
| <b>oaqd</b>       | souporcell | 1680 | 1469 | 1592 | 1250       |
|                   | demuxlet   | 1341 | 1172 | 1345 | 1227       |
|                   | vireo      | 1590 | 1481 | 1609 | 1261       |
|                   | scSplit    | 1587 | 1501 | 1600 | 1353       |
|                   | truth      | n/a  | n/a  | n/a  | 1247       |
| <b>ieki</b>       | souporcell | 586  | 591  | 630  | 1138       |
|                   | demuxlet   | 418  | 383  | 447  | 1090       |
|                   | vireo      | 586  | 590  | 630  | 1160       |
|                   | scSplit    | 610  | 659  | 659  | 1241       |
|                   | truth      | n/a  | n/a  | n/a  | 1133       |
| <b>unassigned</b> | souporcell | 2    | 1    | 2    | 5          |
|                   | demuxlet   | 0    | 0    | 0    | 0          |
|                   | vireo      | 2    | 1    | 1    | 13         |
|                   | scSplit    | 0    | 0    | 0    | 0          |

Evaluation of clustering metrics for each tool on HipSci experimental mixtures as well as one representative synthetic mixture with 5% ambient RNA and 6% doublets.

**Supp Table 3: Maternal/Fetal clustering.**

|  | method | placenta1 | placenta2 | decidua1 |
|--|--------|-----------|-----------|----------|
|--|--------|-----------|-----------|----------|

|                                                                             |            |             |             |             |
|-----------------------------------------------------------------------------|------------|-------------|-------------|-------------|
| <b>ARI vs demuxlet single best (excluding doublets called by each tool)</b> | souporcell | 0.96        | 0.96        | 0.93        |
|                                                                             | vireo      | 0           | 0.18        | 0.3         |
|                                                                             | scSplit    | 0.03        | 0           | 0           |
| <b>ambient RNA</b>                                                          | souporcell | 4%          | 3.80%       | 6.80%       |
| <b>cells evaluated</b>                                                      | souporcell | 3835        | 3968        | 2119        |
|                                                                             | demuxlet   | 3805        | 3941        | 2115        |
|                                                                             | vireo      | 3835        | 3968        | 2119        |
|                                                                             | scSplit    | 3835        | 3968        | 2119        |
| <b>doublets</b>                                                             | souporcell | 49 (1.2%)   | 40 (1%)     | 3 (0.14%)   |
|                                                                             | demuxlet   | 189 (4.9%)  | 168 (4.2%)  | 112 (5.3%)  |
|                                                                             | vireo      | 660 (17.2%) | 543 (13.7%) | 229 (10.8%) |
|                                                                             | scSplit    | 1705 (44%)  | 2297 (58%)  | 1145 (54%)  |
| <b>Maternal</b>                                                             | souporcell | 217         | 232         | 1944        |
|                                                                             | demuxlet   | 198         | 201         | 1863        |
|                                                                             | vireo      | 924         | 822         | 1240        |
|                                                                             | scSplit    | 1063        | 675         | 542         |
| <b>Fetal</b>                                                                | souporcell | 3316        | 3432        | 151         |
|                                                                             | demuxlet   | 3418        | 3572        | 140         |
|                                                                             | vireo      | 1427        | 1822        | 440         |
|                                                                             | scSplit    | 1067        | 996         | 432         |
| <b>unassigned</b>                                                           | souporcell | 253         | 274         | 21          |
|                                                                             | demuxlet   | 0           | 0           | 0           |
|                                                                             | vireo      | 824         | 781         | 210         |
|                                                                             | scSplit    | 0           | 0           | 0           |

A comparison of the clustering performance of each tool on the maternal/fetal data.

#### Supp Table 4: Plasmodium clustering.

|                                                                             | method     | Plasmodium1 | Plasmodium2 | Plasmodium3* |
|-----------------------------------------------------------------------------|------------|-------------|-------------|--------------|
| <b>ARI vs demuxlet single best (excluding doublets called by each tool)</b> | souporcell | 1           | 0.99        | 0.99         |
|                                                                             | vireo      | 0.95        | 0.51        | 0.24         |
|                                                                             | sc_split   | 0.6         | 0.46        | 0.45         |
| <b>ambient RNA</b>                                                          | souporcell | 2.4%        | 3.7%        | 6.8%         |

|                 |             |                       |                                                                      |                                     |
|-----------------|-------------|-----------------------|----------------------------------------------------------------------|-------------------------------------|
| <b>doublets</b> | sourporcell | 92 (3.5%)             | 175 (9.2%)                                                           | 41 (1.8%)                           |
|                 | demuxlet    | 621 (23.8%)           | 297 (15.7%)                                                          | 283 (12.3%)                         |
|                 | vireo       | 241 (9.2%)            | 340 (18%)                                                            | 423 (18.4%)                         |
|                 | sc_split    | 338 (13%)             | 272 (14.4%)                                                          | 463 (20%)                           |
| <b>3D7</b>      | sourporcell | 1079                  | 705                                                                  | 1805                                |
|                 | demuxlet    | 951                   | 703                                                                  | 1649                                |
|                 | vireo       | 1040                  | 476                                                                  | 883 (in 2 clusters)                 |
|                 | sc_split    | 1131 (in 2 clusters)  | 784 (in 2 clusters)                                                  | 1390 (in 2 cluster)                 |
| <b>GB4</b>      | sourporcell | 392                   | 268                                                                  | 166 (including the SenTh strains)   |
|                 | demuxlet    | 331                   | 242                                                                  | 73                                  |
|                 | vireo       | 336 (in 2 clusters)   | 198                                                                  | n/a                                 |
|                 | sc_split    | 389                   | 281 (cluster contains both GB4 and SenTh015)                         | n/a                                 |
| <b>7G8</b>      | sourporcell | 273                   | 201                                                                  | 281                                 |
|                 | demuxlet    | 223                   | 183                                                                  | 229                                 |
|                 | vireo       | 292                   | 294 (cluster contains both 7G8 and SenTh028)                         | 435 (including all non-3D7 strains) |
|                 | sc_split    | 237                   | 311                                                                  | 440 (including all non-3D7 strains) |
| <b>SenTh011</b> | sourporcell | 239                   | 159                                                                  | n/a                                 |
|                 | demuxlet    | 128                   | 139                                                                  | 11                                  |
|                 | vireo       | 229                   | 117                                                                  | n/a                                 |
|                 | sc_split    | 323                   | 254 (cluster contains both Senth011 and a smattering of other cells) | n/a                                 |
| <b>SenTh015</b> | sourporcell | 215                   | 149                                                                  | n/a                                 |
|                 | demuxlet    | 163                   | 121                                                                  | 42                                  |
|                 | vireo       | no cluster represents | no cluster clearly                                                   | n/a                                 |

|                   |             |                       |                                           |     |
|-------------------|-------------|-----------------------|-------------------------------------------|-----|
|                   |             |                       | represents this strain                    |     |
|                   | sc_split    | 190                   |                                           | n/a |
| <b>SenTh028</b>   | sourporcell | 323                   | 232                                       | n/a |
|                   | demuxlet    | 190                   | 208                                       | 5   |
|                   | vireo       | 320                   | no cluster clearly represents this strain | n/a |
|                   | sc_split    | no cluster represents | split across many clusters                | n/a |
| <b>unassigned</b> | sourporcell | 6                     | 23                                        | 0   |
|                   | demuxlet    | 0                     | 0                                         | 0   |
|                   | vireo       | 150                   | 335                                       | 551 |
|                   | sc_split    | 0                     | 0                                         | 0   |

A comparison of the clustering performance of each tool on the Plasmodium data.
